# Supplementary material for: Liquid Channels Built-In Solid Magnesium Hydrides for Boosting Hydrogen Sorption
Source: MDPI journal article supplement (doi:10.3390/inorganics11050216), 2023-05-17
Supplement: s1 [file s1]

Supporting Information

## **Liquid channel built-in solid magnesium hydrides for boosting hydrogen sorption**

**Zhi-Kang Qin, Li-Qing He, Xiao-Li Ding,\* Ting-Zhi Si, Ping Cui,\* Hai-Wen Li, and Yong-Tao Li**

Z.-K Qin, T.-Z Si, X. L Ding \*, P. Cui \*, Y.-T Li

School of Materials Science and Engineering & Low-Carbon New Materials Research Center,  
Anhui University of Technology, Maanshan, Anhui 243002, China.

email: E-mail: dingxiaoli@ahut.edu.cn

Y.-T Li

Key Laboratory of Green Fabrication and Surface Technology of Advanced Metal Materials  
of Ministry of Education, Anhui University of Technology, Maanshan 243002, China.

L.-Q He, H.-W Li

Hefei General Machinery Research Institute, Hefei, Anhui 230031, China.

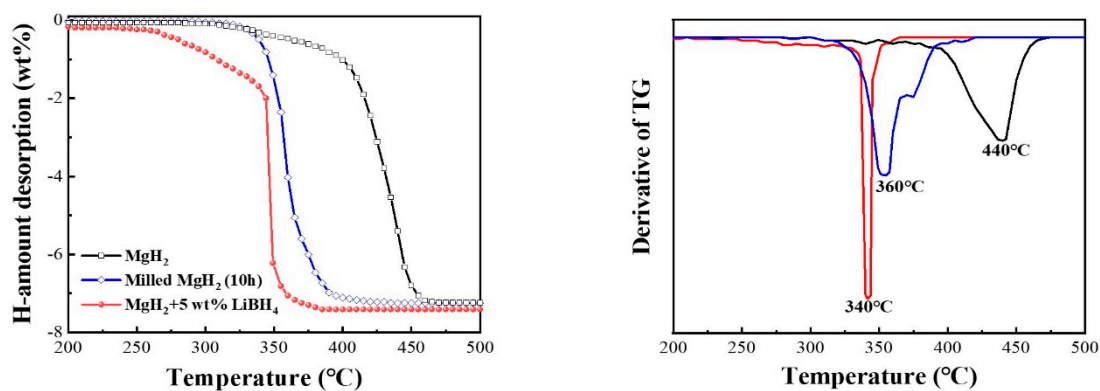

**Figure S1.** Temperature-programmed kinetics of desorption for bulk MgH<sub>2</sub> compared with ball-milled and doped 5wt% LiBH<sub>4</sub> (left) corresponding first order derivative graph (right).

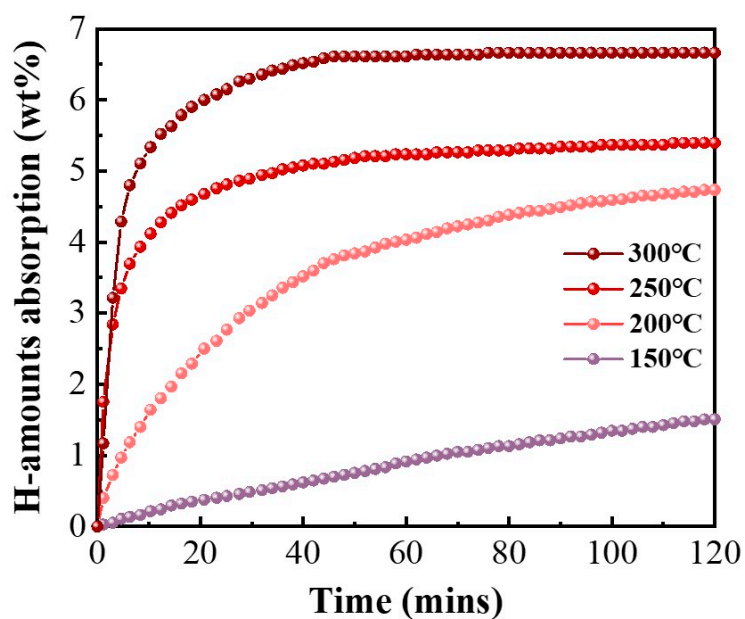

**Figure S2.** Isothermal absorption of MgH<sub>2</sub> at 150, 200, 250, and 300°C.

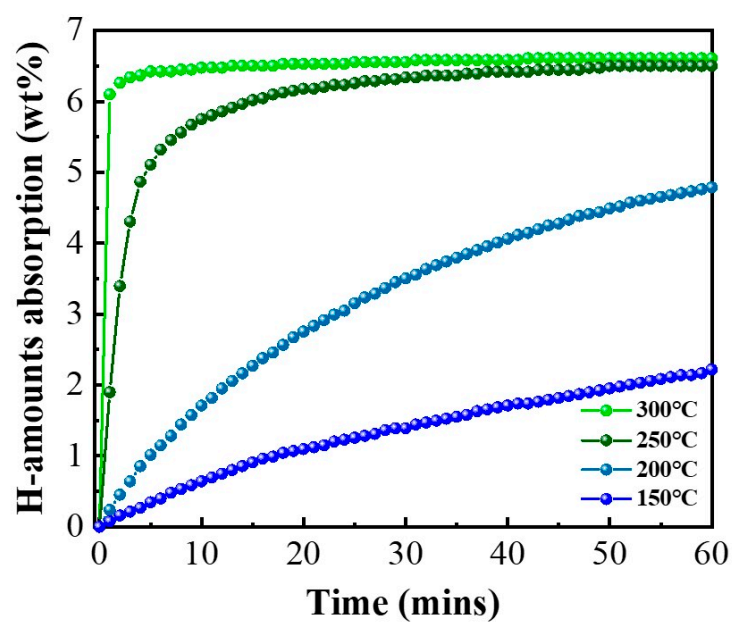

**Figure S3.** Isothermal absorption of LiBH<sub>4</sub>-doped MgH<sub>2</sub> at 150, 200, 250, and 300°C.

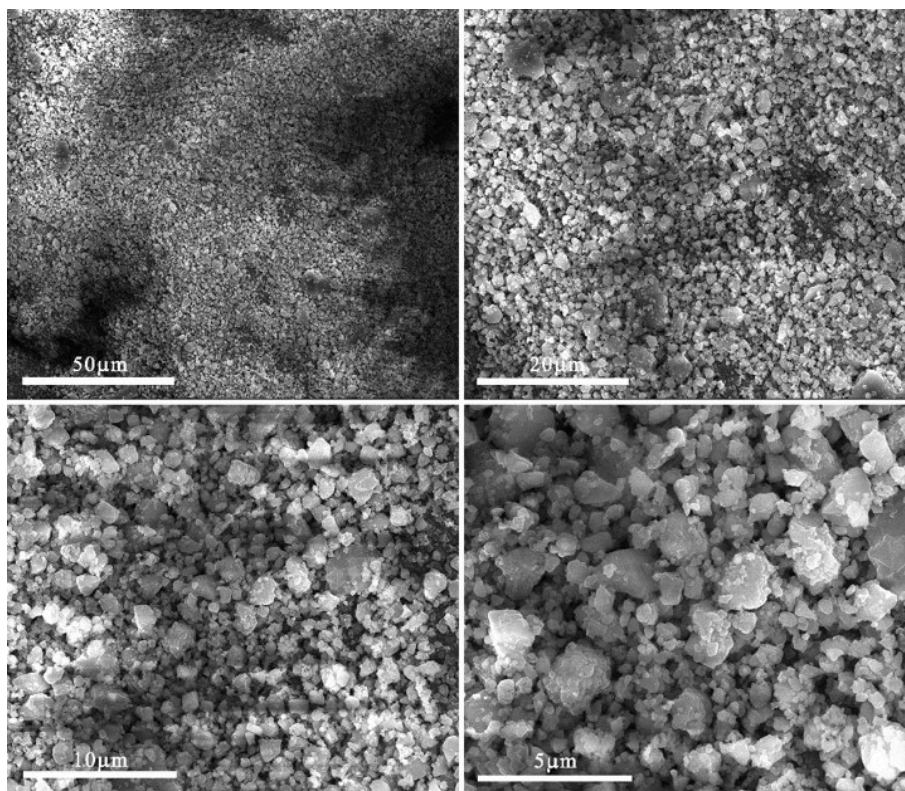

**Figure S4.** SEM images of LiBH<sub>4</sub>-doped MgH<sub>2</sub> before kinetic cycle

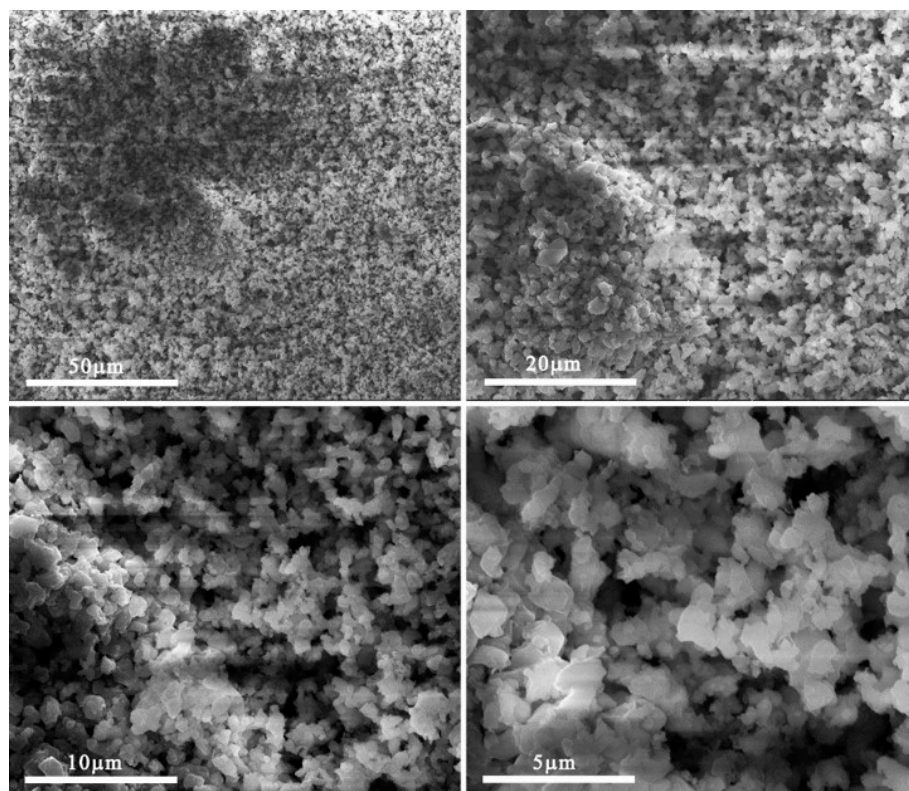

**Figure S5.** SEM images of LiBH<sub>4</sub>-doped MgH<sub>2</sub> after six kinetic cycles



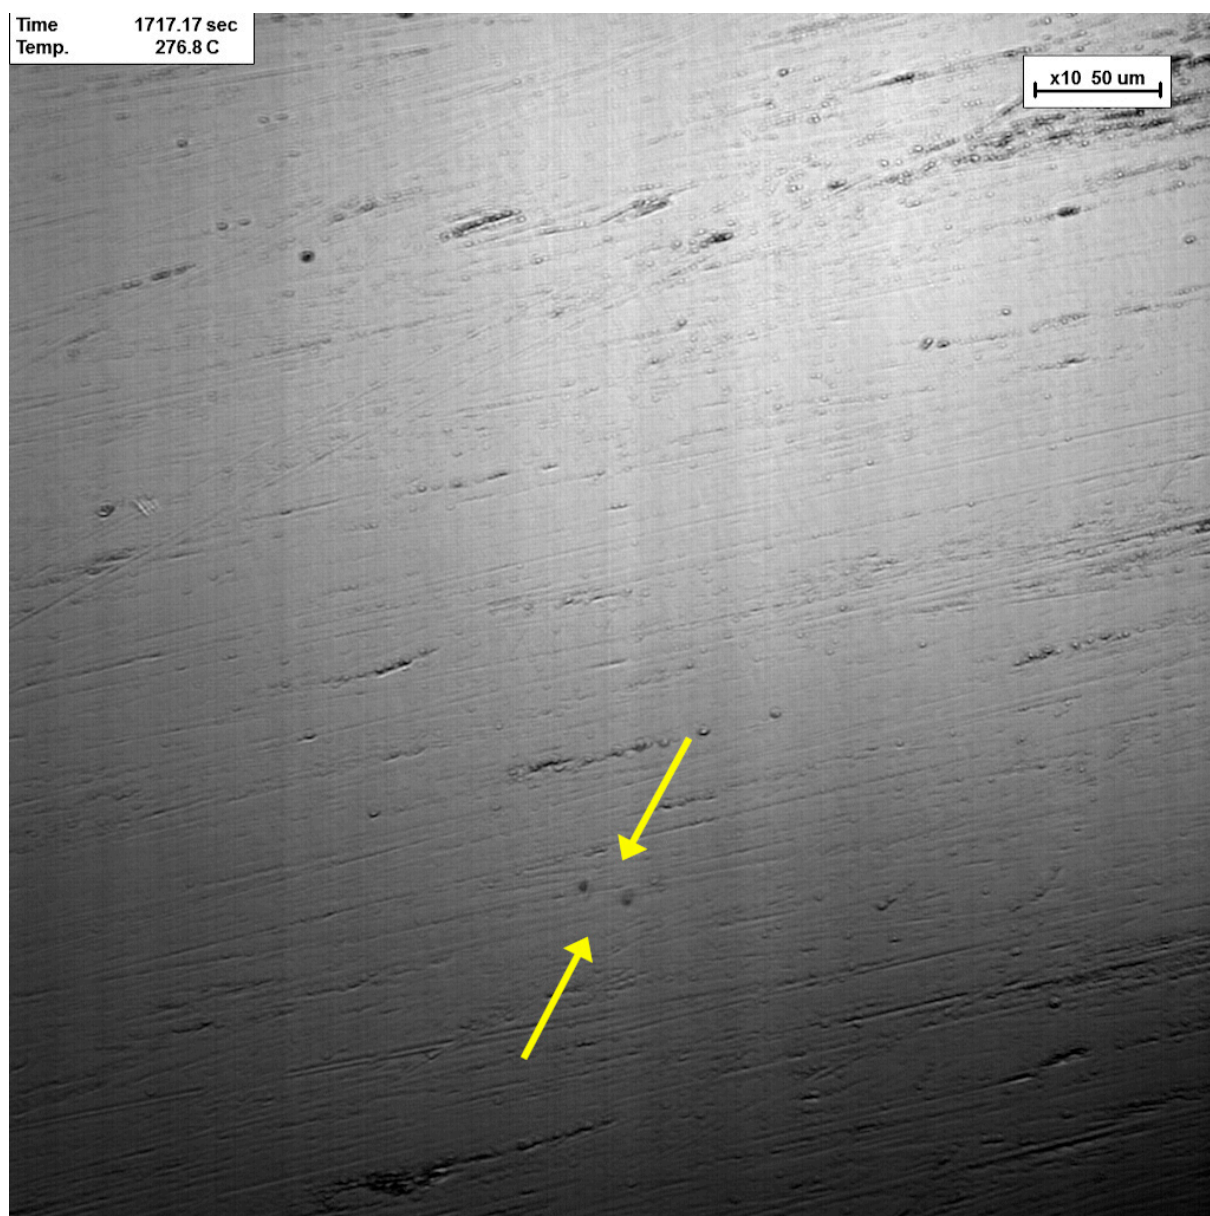

**Figure S6.** High temperature laser confocal image for liquid phase transition during hydrogen desorption at 276°C

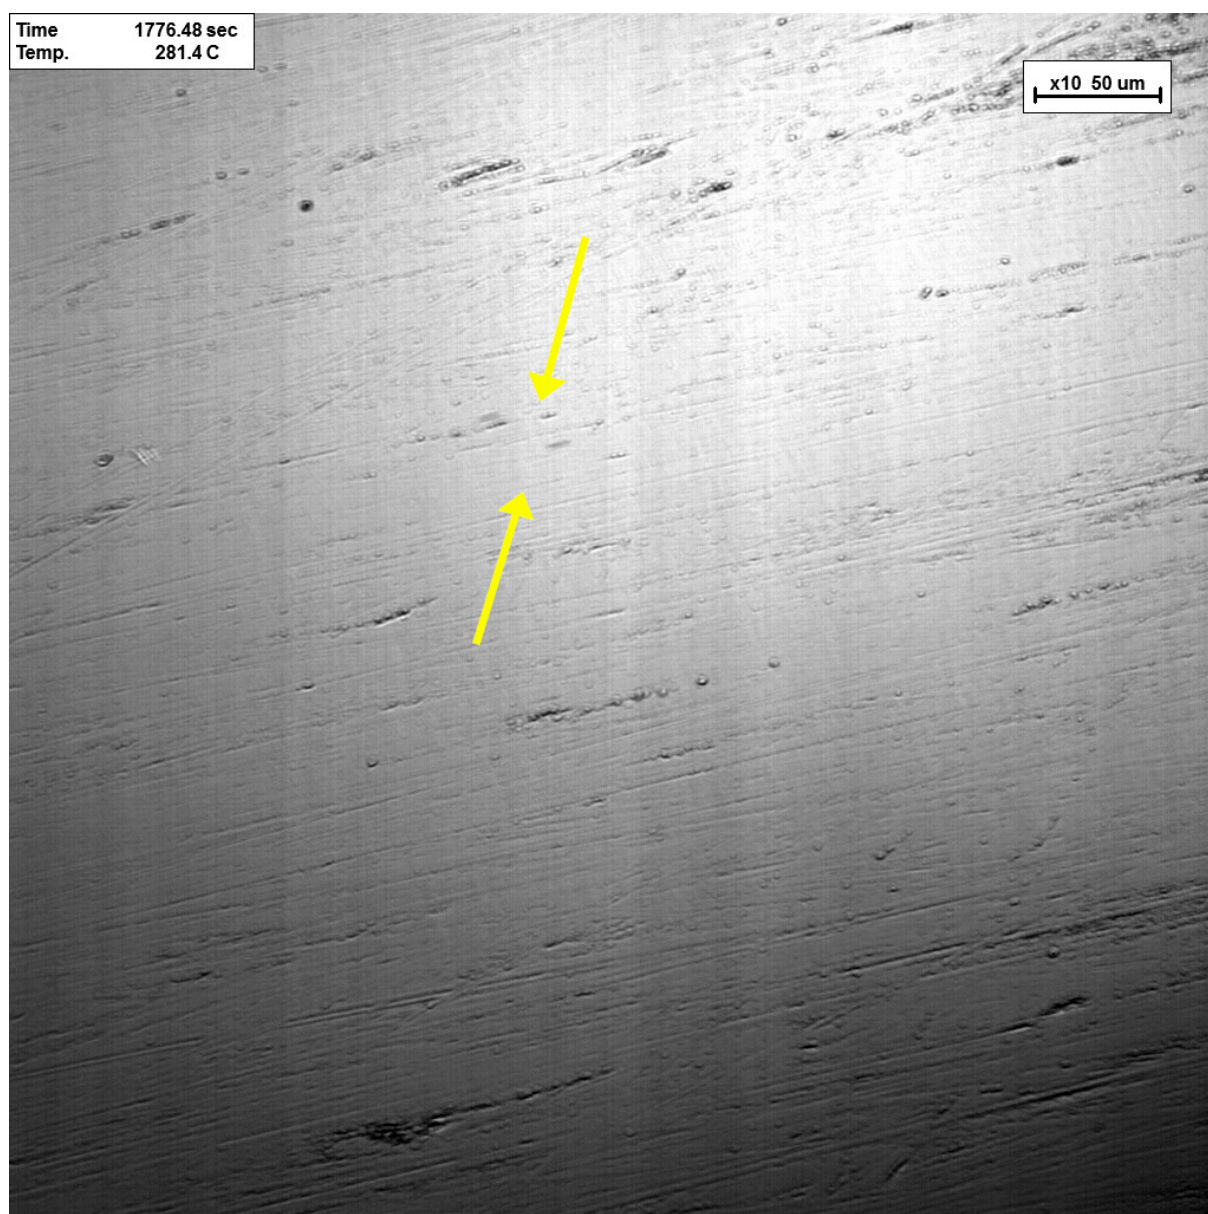

**Figure S7.** High temperature laser confocal image for liquid phase transition during hydrogen desorption at 281°C
