# Supplementary material for: Liquid Channels Built-In Solid Magnesium Hydrides for Boosting Hydrogen Sorption
Source: MDPI journal article supplement (doi:10.3390/inorganics11050216), 2023-05-17
Supplement: s1 [file s1]

Archive with 1 entries (1 files):
- inorganics-2323634-supplementary.pdf
